1 Race and gender disparity of dietary lycopene intake and periodontitis severity in  
2 older adults

3  
4 Katherine Kwong<sup>1</sup>, You Lu<sup>2</sup>, ZhuoHuan Li<sup>3</sup>, Ting Luo<sup>4</sup>, Zhaoyu Huang<sup>5</sup>, Na Zhao<sup>5,\*</sup> and Tung-  
5 Sung Tseng<sup>6,†</sup>

6  
7 <sup>1</sup>Department of Human Development, Connecticut College, New London, CT, USA

8 <sup>2</sup>Center for Aging, Tulane University, New Orleans, LA, USA

9 <sup>3</sup>Department of Biostatistics, Tulane University, New Orleans, LA, USA

10 <sup>4</sup>Moore's Cancer Center, School of Medicine, University of California San Diego, CA, USA

11 <sup>5</sup>School of Software, Yunnan University, Kunming, China

12 <sup>6,\*</sup>Behavioral and Community Health Science, School of Public Health, Louisiana State  
13 University Health Science Center, New Orleans, LA.

14  
15  
16  
17  
18  
19  
20  
21  
22  
23  
24  
25  
26  
27  
28  
29  
30  
31  
32  
33  
34  
35

36 Running Title: Lycopene Intake and Periodontal Disease

37

38 Correspondence:

39 †Tung-Sung Tseng

40 Address: 202 Gravier Street, Room 213, New Orleans, Louisiana, 70112. USA

41 Email: [ttseng@lsuhsc.edu](mailto:ttseng@lsuhsc.edu)

42

43 Co-correspondence:

44 \*Na Zhao

45 Address: Key Laboratory in Software Engineering of Yunnan Province, School of Software,  
46 Yunnan University, Kunming, China.

47 Email: [zhaonayx@126.com](mailto:zhaonayx@126.com)

48

49

50

51

52

53

54

55

56

57

58

59

60

61

62

63

64

65 **Abstract**

66 **Purpose:**

67 Periodontitis in older adults is a public health issue. There is a growing population of older adults  
68 in the United States; furthermore, the proportion of the population of older adults who identify as  
69 a racial minority are growing at a faster rate than non-minority identifying older adults. Sufficient  
70 lycopene intake is one potential solution for individuals who express reluctance and/or an inability  
71 to access preventative oral care particularly by older adults who self-identify as a racial minority,  
72 leading to lower levels of periodontitis if they consume a sufficient amount of lycopene. The  
73 objective of this paper is to explore the association between insufficient lycopene intake and risk  
74 of periodontitis among older adults.

75 **Methods:**

76 Data analysis was conducted using data from the National Health and Nutritional Examination  
77 Survey 2009-2014. Overall, 1227 adults aged 65- to 79-years-old were investigated. The total  
78 lycopene intake from daily diet, age, race/ethnicity, living condition, smoking status, body mass  
79 index, diabetes, gender, and education level were studied as independent variables. The  
80 combination of probing depth and number of interproximal sites was used as criteria for evaluating  
81 the risk of periodontitis. Weighted multinomial logistic regression was used.

82

83 **Results:**

84 Overall, 48.7% of older adults in this study were classified with different levels of periodontitis  
85 and 49.1% of individuals with a form of periodontitis had insufficient dietary lycopene intake.  
86 Sufficient lycopene intake was found to be associated with a lower likelihood of severe  
87 periodontitis (OR: .33; 95% CI: 0.17-.65; p=0.002). Non-Hispanic Black older adults were more  
88 likely to develop severe forms of periodontal disease in comparison to Non-Hispanic White older  
89 adults (OR: 2.82, 95% CI: 1.46-5.45, p=0.003). Gender was also found to play a role in  
90 periodontitis status, with women being less likely to have severe periodontitis status, compared to  
91 men (OR: 0.27; 95% CI: 0.14-0.55; p= 0.0007,). However, only Non-Hispanic White females were  
92 less likely to have severe periodontitis compared to Non-Hispanic White males (OR: 0.26; 95%  
93 CI: 0.12-0.56; p= 0.001).

94 **Conclusion:** Dietary intake of lycopene associated with periodontitis disease for individuals over  
95 the age of 65; those who consume a sufficient amount of lycopene are less likely to develop  
96 severe periodontitis. In general, more men suffered from periodontitis in comparison to women.  
97 Such association also has been found between Non-Hispanic Blacks with severe periodontitis. In  
98 addition, reduced risk of severe periodontitis is associated with sufficient lycopene intake is  
99 explored in Non-Hispanic Whites, future targeted interventions using lycopene in dietary intake  
100 as a preventative measure to delay or prevent the onset of periodontal disease needs to be race  
101 and gender specific.

102

103 **Keywords:** Lycopene Intake, Periodontitis, Older Adults, Racial Disparity

104 **Introduction**

105 It is estimated that periodontal disease affects more than 47% of adults over the age 30 in  
106 the United States but affects a significantly higher proportion of older adults over the age of 65,  
107 approximately 70% [1]. Periodontitis (PD) As one type of periodontal disease, periodontitis (PD)  
108 is characterized by severe inflammation of the gums and if left untreated, can lead to tooth loss.  
109 Preventative measures in developing PD include regular oral care from a profession [2-4]. While  
110 some individuals may be more genetically predisposed to develop PD, PD has the potential to  
111 affect any individual with poor dental hygiene [5, 6]. The consequence of tooth loss or edentulism  
112 due to untreated PD has the potential to subsequently negatively impact an individual's nutritional  
113 intake [3, 7]. In addition, the loss of a tooth or teeth has also been shown to negatively impact self-  
114 esteem and overall quality of life of individuals [8, 9]. Previous studies have observed racial  
115 disparity of PD in non-Hispanic White (NHW) and non-Hispanic Black (NHB) adults with an  
116 indication that PD is a risk factor for other chronic, and potentially more serious health conditions  
117 resulting in more than just edentulism [10-13]. Poor periodontal health is associated with an  
118 increased prevalence of other conditions such as: hypertension, diabetes, and stroke [10-12].

119 While predisposing variables such as age, gender, and race/ethnicity impact observed  
120 disparity in PD, they cannot be modified. However, dietary intake of lycopene, a non-provitamin  
121 A carotenoid, is one potential preventative measure that can be modified to prevent the  
122 development of PD. Tomato products are the primary dietary source of lycopene in the U.S. but it  
123 can be found in other fruits or vegetables that have a red or pink hue such as apricots, grapes,  
124 guava, and papaya [14, 15]. Extensive studies have established a significant correlation between  
125 lycopene as an adjunct to professional dental cleanings and PD [16-18]. To date, there is limited  
126 research on how the intersections of race and gender affect dietary consumption of lycopene of  
127 minority older adults with severe PD. Understanding the prevalence of PD in NHB older adults  
128 and the impact that consumption of lycopene has on PD will inform future strategies for targeted  
129 interventions. Further research is needed to not only determine if consumption of lycopene through  
130 either nutritional sources or as a supplement is statistically significant in preventing PD and  
131 subsequently other conditions associated with PD, but also how dietary lycopene consumption of  
132 different groups are impacted in different ways.

133

## 134 **Methods**

135 We combined and extracted three consecutive two-year survey cycle datasets (2009-2014)  
136 from the U.S. Centers for Disease Control NHANES dataset for this study. A total of 1227 adults  
137 aged between 65 and 79 years-old, with completed response to questions on lycopene intake and  
138 a recorded oral health record, were included. The lycopene consumption level from dietary intake  
139 was collected from a two-day dietary interview questionnaire on total nutrient intakes, based on  
140 recall responses from survey participants. A multistage, stratified, probability-cluster sampling  
141 method was used during the NHANES data collection, under the supervision of the National  
142 Center for Health Statistics of the CDC [19]. An in-person, face-to-face interview was conducted  
143 for qualified participants at their homes by trained staff. The oral health examination was  
144 conducted in a mobile examination center (MEC). Individual demographic and health-related  
145 information was collected via examination. The survey protocol was revised and approved by the  
146 National Center for Health Statistics Research Ethics Review Board [20]. A paper-based informed  
147 consent form was signed by every participant before the data collection process was initiated.

148

## 149 **Measurements**

150 The main exposure of interest for this work was lycopene intake. NHANES uses the five-  
151 step U.S. Department of Agriculture's Automated Multiple Pass Method (AMPM) to collect  
152 dietary intakes, including lycopene. More details on AMPM are provided in the NHANES dietary  
153 interviewer procedure manuals. A clinical study has shown that lycopene is a promising treatment  
154 for patients with moderate periodontal disease [16]. We defined sufficient lycopene intake from  
155 daily food as  $\geq 8000$ mcg [21]. Anyone who consumes lycopene but  $< 8000$  mcg was defined as  
156 lycopene intake insufficient. Three levels of periodontitis are defined as follows [22]: severe was  
157 defined as having  $\geq 2$  interproximal sites with attachment loss (AL)  $\geq 6$  mm (not on the sample  
158 tooth) and  $\geq 1$  interproximal sites with probing depth (PD)  $\geq 5$ mm; non-severe periodontitis was  
159 defined as combination of moderate and mild cases such that: as  $\geq 2$  interproximal sites with  
160 AL  $\geq 4$  mm (not on the same tooth), or  $\geq 2$  interproximal sites with PD  $\geq 5$ mm or one site with  
161 PD  $\geq 5$ mm (moderate); or  $\geq 2$  interproximal sites with AL  $\geq 3$  mm and  $\geq 2$  interproximal sites  
162 with PD  $\geq 4$ mm (not the same tooth) or one site with  $\geq 5$  mm (mild); none was defined as meets  
163 neither the severe nor non-severe case definitions. Smoking status was categorized into never  
164 smoker, former smoker, and current smoker based on the following questions: "Have you smoked  
165 at least 100 cigarettes?" and "Do you now smoke cigarettes?". Never smoker was defined as a  
166 respondent who reported that they smoked  $< 100$  cigarettes in their lifetime; former smoker was  
167 defined as respondents who reported smoking  $\geq 100$  cigarettes in their lifetime and currently do  
168 no smoke cigarettes; current smoker was defined as respondents who reported smoking  $\geq 100$   
169 cigarettes in their entire lifetime and were currently smoking every day or some days [23]. The  
170 demographic information of included participants included age (65~69, 70~79), race/ethnicity  
171 (NHW, NHB), gender, and education (less than high school or more than high school). Individuals  
172 without diabetes are defined as diabetes free. Based on the marital status options, a participant who  
173 selected "married" or "living with a partner" was defined as living with a partner; a participant  
174 who selected "widowed", "divorced", "separated", or "never married" were defined as living alone  
175 [24]. In addition, Body-Mass-Index (BMI) was classified as underweight/normal, overweight and  
176 obese, respectively [25].

177

## 178 **Ethics**

179 The procedures to obtain human data have been performed in accordance with the  
180 Declaration of Helsinki. All methods carried out in this study for the purpose of this analysis were  
181 reviewed and approved by the Institutional Review Board of Connecticut College #2023.24.23.

## 182 **Outcomes**

183 The level of periodontitis was the primary outcome of interest for this study. We used a  
184 combination of probing depth and attachment loss to determine periodontitis status.

## 185 **Statistical Analysis**

186 Participants' demographics, lycopene intake, smoking behavior, and clinical features were  
187 summarized using descriptive statistics based on the different PD statuses (severe to none). The  
188 association of these factors with PD status was tested using the Rao-Scott Chi-square test for

189 categorical variables and Fisher’s exact test for small samples. A one-way ANOVA test was  
190 applied to examine differences for continuous variables. All analyses were performed in R  
191 (svydesign) using the “survey” package [26] to create the weighted analysis groups for displaying  
192 percentages (%) (svyciprop) and means with standard error of the mean (svymean). Survey-  
193 weighted multinomial logistic regression models (svymultinom) were applied to examine the  
194 association between lycopene intake and PD status in older adults by using the “nnet” and  
195 “svrepmisc” package. We included the suggested covariables: age, gender, race, smoking status,  
196 and education to construct the multinomial logistic regression model [27-34]. All variables had  
197 no multicollinearity in the model. We followed the weighting instructions provided on the CDC  
198 website [35]. All analyses were conducted using R version 3.6.3 with the packages that mentioned  
199 above and repeated in Python 3.8 with package “samplics” [36]. All tests were 2-sided, and a P-  
200 value <0.05 was considered statistically significant for all tests.

201

## 202 **Results**

203 A total of 1227 NHW and NHB older adults between the ages of 65 and 79 were included  
204 from NHANES 2009-2014. Table 1 provides weighted percentage and raw sample sizes from  
205 demographics and lycopene intake by level of PD. For the overall study population, 22.1% of  
206 participants (n=246) had sufficient lycopene intake; 77.9% of participants (n=981) had insufficient  
207 lycopene intake. The self-reported daily lycopene intake of participants with severe, non-severe,  
208 and no level of PD is  $3847\pm 360$ ,  $5452\pm 498$ ,  $5278\pm 338$  (mcg), respectively (p=.006). The  
209 prevalence of all levels of periodontitis is 48.7%. NHB older adults have a higher prevalence of  
210 severe PD and overall PD in comparison to NHW older adults (12.2% vs 4.86% and 55.6% vs  
211 47.86%, respectively; p=.0004). The mean age of people diagnosed with severe PD is  $69.9\pm 0.4$ ,  
212 compared to other groups (p=0.17). Although NHB only takes 10.5% of the whole participants,  
213 around 12.2% of them have been diagnosed with severe PD, which is almost three-fold more than  
214 NHW (p=0.0004). Older adults who take sufficient lycopene from daily dietary have less people  
215 diagnosis with severe PD ( 2.4% vs 6.5%, respectively, p=0.04). The severe PD ratio is also high  
216 in current smokers (18.8%), in which is 4-fold more compared to never and ever smoker (4.6% ,  
217 4.1%, respectively, p=0.0001). In addition, less old female adults have been found in severe PD,  
218 compared to older male adults (3.1% vs 8.3%, respectively, p=0.001). Overall, lycopene intake,  
219 gender, smoking, and race are risk factors that significantly contribute to the level of PD in this  
220 study.

221 The computed results from weighted multinomial logistic regression models are given in  
222 Table 2. After adjusting for covariables, participants with sufficient lycopene intake have 0.33 time  
223 odds (95% CI: 0.17-0.65, p=0.002) associated with severe PD, compared to old adults who have  
224 insufficient lycopene intake. NHB has 2.82 times odds (95% CI: 1.46-5.45, p=0.003) associated  
225 with severe PD in comparison to NHW. Female participants have 0.27-time odds of severe PD,  
226 compared to male participants (95% CI: 0.14-0.55, p=0.0007). Further moderation analysis  
227 confirmed race as a moderator between dietary lycopene intake and severe PD (p<0.0001). Results  
228 of stratification analysis between NHW and NHB are given in Table 3. For NHW, female  
229 participants have 0.26-time odds (95% CI: 0.12-0.56, p=0.001) associated with severe PD

230 compared to males. And NHW participants with sufficient lycopene intake has 0.13-time odds  
231 associated with severe PD (95% CI: 0.05-0.37,  $p < 0.0001$ ), compared to the insufficient intake one.  
232 Such association between severe PD and gender/lycopene intake did not observe in NHB.

233

## 234 **Discussion**

235 For the overall study population, the majority consumed an insufficient amount of dietary  
236 lycopene (77.9%). However, in addition to dietary lycopene consumption, other risk factors of  
237 severe PD were: race, gender and smoking status with NHB, men and current smokers being at  
238 higher risk of developing severe PD. The results of this analysis continue to add to the literature  
239 that there is variability between NHB and NHW older adults with regard to PD  
240 (<https://aap.onlinelibrary.wiley.com/doi/full/10.1002/JPER.22-0137>). NHB women had higher  
241 odds of severe PD in comparison to NHW and race was confirmed to be a moderator between  
242 lycopene intake and severe PD. Previous research has suggested several biological and social  
243 factors that may be contributing to this observed racial disparity. Genetic predisposition to PD, the  
244 inflammation and acid production of the body after the consumption of sugary foods that can  
245 potentially lead to gum disease. Aggressive forms of PD have been shown to have familial  
246 aggregation within the NHB community which suggests that these individuals may be genetically  
247 predisposed to develop PD [37]. The results of this analysis continue to add to the literature that  
248 there is variability between NHB and NHW older adults with regard to PD [13]. NHB women had  
249 higher odds of severe PD in comparison to NHW and race was confirmed to be a moderator  
250 between lycopene intake and severe PD. Previous research has suggested several biological and  
251 social factors that may be contributing to this observed racial disparity. Genetic predisposition to  
252 PD, the inflammation and acid production of the body after the consumption of sugary foods that  
253 can potentially lead to gum disease. Aggressive forms of PD have been shown to have familial  
254 aggregation within the NHB community which suggests that these individuals may be genetically  
255 predisposed to develop PD [38].

256 However, the conclusion of this analysis indicates that another potential factor explaining  
257 the racial disparity in the development of PD is that there is an observed disparity in dietary  
258 lycopene intake. Lycopene intake is significantly higher in NHW, while prevalence of severe PD  
259 is lower [39]. Another possible reason why NHB older adults had higher prevalence of PD may be  
260 due to how additional preventative measures of PD were determined for the purpose of this  
261 analysis. Previous studies recognize racial differences in oral health status, but few emphasize the  
262 disparity of PD in older adults and analyze modifiable risk factors that focus on nutrition instead  
263 of preventative dental care or non-modifiable factors [40-42].

264

265

266

267 The present study also investigated whether gender impacted the prevalence of PD. The  
268 likelihood of having PD was significantly lower for older females than males. Females were found  
269 to be approximately half as likely to develop severe PD non-severe PD than males (Odds Ratio =  
270 0.27 and 0.73). Men have been found to be less likely to seek preventative dental care, use tobacco

271 products at a higher rate, and hormone differences [43]. Additionally, race mediated the impact of  
272 dietary lycopene intake and PD. Higher levels of lycopene consumption were associated with a  
273 lower likelihood of PD in older adults. However, this study has determined that sufficient lycopene  
274 intake is associated with a higher odds ratio of severe PD. Potential reasons for this discovery  
275 could potentially be the known irreversibility of PD. Once PD is diagnosed, individuals can work  
276 to prevent the increased severity of the disease that may lead to eventual tooth loss but they cannot  
277 reverse the current progress of PD. Subsequently, individuals who have been informed that they  
278 have mild PD and are at risk for developing severe PD, may act to reduce their risk of developing  
279 a more severe form of the disease.

280 A comprehensive review of the literature conducted by Leite (2018) concludes what many  
281 studies have indicated, that smoking has a detrimental effect on PD and the progression of PD  
282 [44]. The disparity in prevalence of smoking amongst different race/ethnicity groups in the US is  
283 well documented [45, 46]. However, dietary lycopene intake has been shown to be a protective  
284 agent against the effects of tobacco promoted changes such as the development of non-alcoholic  
285 steatohepatitis in animal models [47]. Subsequently, although the prevalence of smoking in this  
286 study population is 8.7%, dietary lycopene intake is a potential factor in the reason why there  
287 remains an observed racial and gender disparity in observed severe PD.

288 There are several limitations to this analysis. First, although PD is easily preventable with  
289 regular professional oral care, and dental insurance has the ability to alleviate some of the costs  
290 associated with preventative treatment, the NHANES dataset does not record the status of dental  
291 insurance [48, 49]. Health insurance status, which is recorded by NHANES, cannot be used as a  
292 stand in for dental insurance because preventative dental insurance is not necessarily included in  
293 general health insurance. Although all individuals included in this analysis are over the age of 65  
294 and therefore eligible for Medicare coverage, Medicare does not cover dental services in most  
295 cases, services such as routine dental cleanings [50]. Older adults also have the opportunity to  
296 choose Marketplace coverage via the Affordable Care Act (ACA) instead of Medicare if they have  
297 to pay a Part A premium. However, the ACA treats dental coverage differently based on the age  
298 of the enrolled individual, where dental coverage is an essential benefit for individuals under the  
299 age of 18 and must be available, it is not an essential benefit for older adults and health plans on  
300 the Marketplace are not required to offer older adults dental coverage [51]. This is one of the  
301 challenges encountered when conducting a secondary data analysis with the NHANES dataset,  
302 one of the best preventative measures, preventative oral care, is unable to be considered in this  
303 study because the data was not collected. Although previous studies have shown that preventative  
304 dental treatments have lowered the risk of developing PD, this factor was not included in this  
305 study. There are numerous external factors that other studies have linked to the prevention of PD  
306 that were not considered for the models of analysis in this study that may have an additional impact  
307 in not only the prevalence of PD, but also an individual's consumption of dietary lycopene.

308 Although lycopene intake was only calculated as total dietary intake and the source of  
309 lycopene was not taken into account the conclusion of this study is that there is a relationship  
310 between prevalence of severe PD and lycopene intake, which potentially contributes to the observe  
311 racial/ethnic and gender disparity between NHW and NHB older adults and PD. However, this  
312 analysis cannot make the determination if there is a difference between lycopene consumption and



313 PD from food sources versus a combination of lycopene consumption from food and supplements.  
314 The distinction between intake of lycopene from a food source in contrast to lycopene from a  
315 supplement, may have an impact on PD due to the fact that previous studies have demonstrated  
316 that antioxidant treatment with lycopene could potentially be beneficial as an adjunctive treatment  
317 periodontal disease [52]. Nevertheless, certain foods that contain lycopene may actually impact  
318 inflammation and acid production in the oral cavity which may have an impact on the prevalence  
319 of gum disease due to either increased levels of lycopene in the blood or due to increased levels of  
320 lycopene in the oral cavity. While this study concludes that there is a correlation between dietary  
321 intake of lycopene and severe PD in older adults, the vehicle in which lycopene impacts PD in this  
322 analysis is not determined.

323

## 324 **Conclusion**

325 The objective of this study is to explore the association between insufficient lycopene  
326 intake and the risk of PD in older adults. Overall, insufficient lycopene intake was found to be a  
327 risk factor associated with the development of PD. Although this study was not able to distinguish  
328 between the different sources of dietary lycopene, the conclusions of this analysis determined that  
329 dietary intake of lycopene is a predictor of severe PD for NHW individuals between the ages of  
330 65 and 79 years old. Subsequently, although dietary lycopene intake was found to be associated  
331 with levels of PD in this analysis, the racial differences indicate that while Future targeted  
332 interventions using lycopene in dietary intake as a preventative measure to delay or prevent the  
333 onset of periodontal disease needs to be race and gender specific.

334

## 335 **Funding**

336 Publication of this research was partially supported by the Susan Eckert Lynch '62 Faculty  
337 Research Fund at Connecticut College. N.Z. and ZY.H have been supported by National Natural  
338 Science Foundation of China under Grant No.62066048 and No.62366057.

339

340

## 341 **Competing Interest**

342 The authors have no relevant financial or non-financial interests to disclose.

343

## 344 **Author Contributions**

345 K.K. and Y.L. contributed equally to this study. K.K. contributed to the original literature  
346 review and to the conception and design of this study. Y.L. contributed to the conception, design,  
347 and database organization of the study. Y.L. and ZH.L. performed the statistical analysis in R.

348 ZY.H performed the statistical analysis in Python. K.K. and T.L cross-validated this study. T.S.T.  
349 and N.Z. supervised this study. All authors contributed to manuscript writing.

### 350 **Data and code Availability**

351 Publicly available datasets were analyzed in this study. These data can be found at:  
352 <https://www.cdc.gov/nchs/nhanes/index.htm>. The analysis code will be provided upon request.

353

### 354 **Ethics approval**

355 The study used publicly available datasets that meet the federal regulation at 46 CFR  
356 46.102.

357

### 358 **Consent to participate**

359 N.A.

360

### 361 **Consent to publish**

362 N.A,

363

364

365 **Table1.** Factors associated with different degrees of periodontitis in older adults aged 65 years  
 366 and older (Weighted )

| Characteristics                  | Overall   | PD Sev    | PD Non Sev | Normal     | p-Value |
|----------------------------------|-----------|-----------|------------|------------|---------|
| total, n(%)                      | 1227      | 98(5.6)   | 531(43.1)  | 598 (51.3) |         |
| Mean lycopene Intake ± SEM (mcg) | 5273(318) | 3847(360) | 5452(498)  | 5278(338)  | 0.006   |
| Mean age ± SEM (year)            | 70.5(0.1) | 69.9(0.4) | 70.6(0.2)  | 70.5(0.2)  | 0.17    |
|                                  |           |           |            |            |         |
| <b>Lycopene Intake, n(%)</b>     |           |           |            |            | 0.04    |
| Insufficient                     | 981(77.9) | 81(6.5)   | 424(42.6)  | 476(50.9)  |         |
| Sufficient                       | 246(22.1) | 17(2.4)   | 107(44.7)  | 122(52.9)  |         |
|                                  |           |           |            |            |         |
| <b>Race, n(%)</b>                |           |           |            |            | 0.0004  |
| Non-Hispanic White               | 875(89.5) | 51(4.86)  | 377(43)    | 447(52.1)  |         |
| Non-Hispanic Black               | 352(10.5) | 47(12.2)  | 154(43.4)  | 151(44.4)  |         |
|                                  |           |           |            |            |         |
| <b>Education Level, n(%)</b>     |           |           |            |            | 0.14    |
| < High School                    | 269(16)   | 25(5.5)   | 98(35.6)   | 146(58.9)  |         |
| >=High School                    | 956(84)   | 73(5.7)   | 431(44.3)  | 452(50.0)  |         |
|                                  |           |           |            |            |         |
| <b>Smoking Status, n(%)</b>      |           |           |            |            | 0.0001  |
| Never Smoker                     | 553(47.1) | 41(4.6)   | 233(43.8)  | 279(51.6)  |         |
| Ever Smoker                      | 542(44.2) | 38(4.1)   | 253(44.5)  | 251(51.3)  |         |
| Current Smoker                   | 120(8.7)  | 19(18.8)  | 42(34.9)   | 59(46.3)   |         |
|                                  |           |           |            |            |         |
| <b>Gender, n(%)</b>              |           |           |            |            | 0.001   |
| Male                             | 624(48.1) | 70(8.3)   | 288(45.3)  | 266(46.3)  |         |
| Female                           | 603(51.9) | 28(3.1)   | 243(40.9)  | 332(56.0)  |         |
|                                  |           |           |            |            |         |
| <b>Age , n(%)</b>                |           |           |            |            | 0.73    |
| 65-70                            | 570(52.9) | 51(6.1)   | 257(43.9)  | 262(50.0)  |         |
| 71-79                            | 657(47.1) | 47(5.1)   | 274(42.1)  | 336(52.8)  |         |
|                                  |           |           |            |            |         |
| <b>Living Condition, n(%)</b>    |           |           |            |            | 0.53    |
| With Partner                     | 769(69.4) | 57(5.5)   | 330(42.2)  | 382(52.4)  |         |
| Alone                            | 458(30.6) | 41(6.0)   | 201(45.1)  | 216(48,9)  |         |
|                                  |           |           |            |            |         |
| <b>Diabetes, n(%)</b>            |           |           |            |            | 0.89    |
| Diabetes Positive                | 288(18.2) | 19(6.9)   | 129(45.6)  | 140(47.5)  |         |
| Diabetes Negative                | 886(77.2) | 75(5.1)   | 380(42.7)  | 431(52.2)  |         |
|                                  |           |           |            |            |         |

| BMI, n(%)           |           |         |           |           | 0.79 |
|---------------------|-----------|---------|-----------|-----------|------|
| Under/normal Weight | 340(29.5) | 31(4.6) | 144(43.8) | 165(48.8) |      |
| Overweight          | 457(37.2) | 36(4.8) | 200(43.9) | 221(51.2) |      |
| Obese               | 423(33.3) | 31(6.5) | 42(40.0)  | 59(53.5)  |      |

367

368

369

370

371

372

373

374

375

376

377 Table 2: Factors associated with PD status at severe (Sev), non-severe (PD Non  
378 Sev) to non-PD.

| Characteristics          | PD Sev      |           |         | PD Non Sev  |           |         |
|--------------------------|-------------|-----------|---------|-------------|-----------|---------|
|                          | Adjusted OR | 95%CI     | p-Value | Adjusted OR | 95%CI     | p-Value |
| <b>Lycopene Intake</b>   |             |           | 0.002   |             |           | 0.9     |
| Insufficient (Ref)       | 1           |           |         | 1           |           |         |
| Sufficient               | 0.33        | 0.17-0.65 |         | 0.97        | 0.64-1.49 |         |
|                          |             |           |         |             |           |         |
| <b>Race</b>              |             |           |         |             |           |         |
| Non-Hispanic White (Ref) | 1           |           | 0.003   | 1           |           | 0.121   |
| Non-Hispanic Black       | 2.82        | 1.46-5.45 |         | 1.32        | 0.93-1.87 |         |
|                          |             |           |         |             |           |         |
| <b>Smoking Status</b>    |             |           |         |             |           |         |
| Never Smoker (Ref)       | 1           |           |         | 1           |           |         |
| Ever Smoker              | 0.7         | 0.33-1.48 | 0.33    | 0.99        | 0.63-1.54 | 0.95    |
| Current Smoker           | 3.29        | 1.55-6.97 | 0.002   | 0.86        | 0.44-1.70 | 0.66    |
|                          |             |           |         |             |           |         |
| <b>Education Level</b>   |             |           | 0.4     |             |           | 0.09    |

|                     |      |           |        |      |           |      |
|---------------------|------|-----------|--------|------|-----------|------|
| < High School (Ref) | 1    |           |        | 1    |           |      |
| >= High School      | 1.49 | 0.58-3.84 |        | 1.5  | 0.93-2.42 |      |
|                     |      |           |        |      |           |      |
| <b>Gender</b>       |      |           | 0.0007 |      |           | 0.09 |
| Male (Ref)          | 1    |           |        | 1    |           |      |
| Female              | 0.27 | 0.14-0.55 |        | 0.73 | 0.50-1.06 |      |
|                     |      |           |        |      |           |      |
| <b>Age</b>          |      |           |        |      |           |      |
| 65-70(Ref)          | 1    |           |        | 1    |           |      |
| 71-79               | 0.91 | 0.46-1.82 | 0.78   | 0.9  | 0.57-1.43 | 0.65 |

379

380

381

382

383

384

385

386

387

388

389

390

391

392 Table 3: Factors associated with PD across different race groups.

393

| Characteristics | Non-Hispanic Black |       |         |             |       |         |
|-----------------|--------------------|-------|---------|-------------|-------|---------|
|                 | PD Sev             |       |         | PD Non Sev  |       |         |
|                 | Adjusted OR        | 95%CI | p-Value | Adjusted OR | 95%CI | p-Value |
| Lycopene Intake |                    |       | 0.15    |             |       | 0.41    |

|                    |                    |           |         |             |           |         |
|--------------------|--------------------|-----------|---------|-------------|-----------|---------|
| Insufficient (Ref) | 1                  |           |         | 1           |           |         |
| Sufficient         | 2                  | 0.76-5.26 |         | 0.73        | 0.34-1.57 |         |
| Gender             |                    |           | 0.13    |             |           | 0.87    |
| Male (Ref)         | 1                  |           |         | 1           |           |         |
| Female             | 0.37               | 0.11-1.37 |         | 0.94        | 0.44-2.03 |         |
|                    | Non-Hispanic White |           |         |             |           |         |
| Characteristics    | PD Sev             |           |         | PD Non Sev  |           |         |
|                    | Adjusted OR        | 95%CI     | p-Value | Adjusted OR | 95%CI     | p-Value |
| Lycopene Intake    |                    |           | <0.0001 |             |           | 0.95    |
| Insufficient (Ref) | 1                  |           |         | 1           |           |         |
| Sufficient         | 0.13               | 0.05-0.37 |         | 1..01       | 0.69-1.54 |         |
| Gender             |                    |           | 0.001   |             |           | 0.08    |
| Male (Ref)         | 1                  |           |         | 1           |           |         |
| Female             | 0.26               | 0.12-0.56 |         | 0.72        | 0.51-1.03 |         |

394

395

396

397

398

399

400

401

402

403

404

405

406

407

408

409 Reference

410

- 411 1. Clinic, C., *Periodontitis (gum disease): Symptoms, stages & treatment*. Cleveland Clinic. Cleveland  
412 Clinic, 2022. **October 4**.
- 413 2. Tonetti, M.S., T.E. Van Dyke, and w.g.o.t.j.E.A. workshop\*, *Periodontitis and atherosclerotic*  
414 *cardiovascular disease: consensus report of the Joint EFP/AAPWorkshop on Periodontitis and*  
415 *Systemic Diseases*. Journal of periodontology, 2013. **84**: p. S24-S29.
- 416 3. Kwon, T., I.B. Lamster, and L. Levin, *Current concepts in the management of periodontitis*.  
417 International dental journal, 2021. **71**(6): p. 462-476.
- 418 4. National Institute of Dental and Craniofacial Research. (<https://www.nidcr.nih.gov/health-info>).
- 419 5. Tettamanti, L., et al., *Genetic susceptibility and periodontal disease: A retrospective study on a*  
420 *large italian sample*. ORAL & implantology, 2017. **10**(1): p. 20.
- 421 6. Loos, B.G. and T.E. Van Dyke, *The role of inflammation and genetics in periodontal disease*.  
422 Periodontology 2000, 2020. **83**(1): p. 26-39.
- 423 7. Zhang, Y., S.G. Leveille, and L. Shi, *Multiple Chronic Diseases Associated with Tooth Loss among*  
424 *the US Adult Population*. Frontiers in big Data, 2022. **5**: p. 932618.
- 425 8. Muhammad, T. and S. Srivastava, *Tooth loss and associated self-rated health and psychological*  
426 *and subjective wellbeing among community-dwelling older adults: A cross-sectional study in India*.  
427 BMC Public Health, 2022. **22**(1): p. 7.
- 428 9. Kaur, S., et al., *Evaluation of anti-inflammatory effects of systemically administered curcumin,*  
429 *lycopene and piperine as an adjunct to scaling and root planing: A clinical study*. Ayu, 2017. **38**(3-  
430 4): p. 117.
- 431 10. Fagundes, N.C.F., et al., *Periodontitis as a risk factor for stroke: a systematic review and meta-*  
432 *analysis*. Vascular Health and Risk Management, 2019: p. 519-532.
- 433 11. Minty, M., et al., *Oral microbiota-induced periodontitis: a new risk factor of metabolic diseases*.  
434 Reviews in Endocrine and Metabolic Disorders, 2019. **20**: p. 449-459.
- 435 12. Del Pinto, R., et al., *Periodontitis and hypertension: is the association causal?* High Blood Pressure  
436 & Cardiovascular Prevention, 2020. **27**: p. 281-289.
- 437 13. Gillone, A., et al., *Racial and ethnic disparities in periodontal health among adults seeking dental*  
438 *care in rural North Carolina Communities: a retrospective study*. Journal of Periodontology, 2023.  
439 **94**(3): p. 364-375.
- 440 14. Gupta, S., et al., *Role of lycopene in preventing oral diseases as a nonsurgical aid of treatment*.  
441 International journal of preventive medicine, 2015. **6**.
- 442 15. Story, E.N., et al., *An update on the health effects of tomato lycopene*. Annual review of food  
443 science and technology, 2010. **1**: p. 189-210.
- 444 16. Belludi, S.A., et al., *Effect of lycopene in the treatment of periodontal disease: A clinical study*. The  
445 Journal of Contemporary Dental Practice, 2014. **14**(6): p. 1054-1059.
- 446 17. Viswa Chandra, R., et al., *Efficacy of lycopene as a locally delivered gel in the treatment of chronic*  
447 *periodontitis: smokers vs nonsmokers*. Quintessence international, 2012. **43**(5).
- 448 18. Reddy, P.V.N., M. Ambati, and R. Koduganti, *Systemic lycopene as an adjunct to scaling and root*  
449 *planing in chronic periodontitis patients with type 2 diabetes mellitus*. Journal of International  
450 Society of Preventive & Community Dentistry, 2015. **5**(Suppl 1): p. S25.
- 451 19. Prevention, C.f.D.C.a., *National Health and Nutrition Examination Survey*.
- 452 20. Prevention, C.f.D.C.a., *National Health and Nutrition Examination Survey*. NCHS Researc hEthics  
453 Review BOard (ERB) Approval.

- 454 21. Giovannucci, E., et al., *A prospective study of tomato products, lycopene, and prostate cancer risk.* Journal of the National Cancer Institute, 2002. **94**(5): p. 391-398.
- 455
- 456 22. Eke, P.I., W.S. Borgnakke, and R.J. Genco, *Recent epidemiologic trends in periodontitis in the USA.* Periodontology 2000, 2020. **82**(1): p. 257-267.
- 457
- 458 23. McClave, A.K., et al., *Associations between health-related quality of life and smoking status among* a large sample of US adults. Preventive medicine, 2009. **48**(2): p. 173-179.
- 459
- 460 24. Sanderson, M., et al., *A multilevel analysis of socioeconomic status and prostate cancer risk.* Annals of epidemiology, 2006. **16**(12): p. 901-907.
- 461
- 462 25. De Giorgi, U., et al., *Association of systemic inflammation index and body mass index with survival* in patients with renal cell cancer treated with nivolumab. Clinical Cancer Research, 2019. **25**(13):
- 463 p. 3839-3846.
- 464
- 465 26. Lumley, T., *Analysis of complex survey samples.* Journal of statistical software, 2004. **9**: p. 1-19.
- 466 27. Mei, Z., et al., *Prognostic role of pretreatment blood neutrophil-to-lymphocyte ratio in advanced* cancer survivors: a systematic review and meta-analysis of 66 cohort studies. Cancer treatment
- 467 reviews, 2017. **58**: p. 1-13.
- 468
- 469 28. Feliciano, E.M.C., et al., *Association of systemic inflammation and sarcopenia with survival in* nonmetastatic colorectal cancer: results from the C SCANS study. JAMA oncology, 2017. **3**(12): p.
- 470 e172319-e172319.
- 471
- 472 29. Tulgar, Y., et al., *The effect of smoking on neutrophil/lymphocyte and platelet/lymphocyte ratio* and platelet indices: a retrospective study. European Review for Medical & Pharmacological
- 473 Sciences, 2016. **20**(14).
- 474
- 475 30. Fest, J., et al., *Reference values for white blood-cell-based inflammatory markers in the Rotterdam* Study: a population-based prospective cohort study. Scientific reports, 2018. **8**(1): p. 10566.
- 476
- 477 31. Kawahara, T., et al., *Neutrophil-to-lymphocyte ratio is a prognostic marker in bladder cancer* patients after radical cystectomy. BMC cancer, 2016. **16**: p. 1-8.
- 478
- 479 32. Xue, T.-C., et al., *Prognostic significance of the neutrophil-to-lymphocyte ratio in primary liver* cancer: a meta-analysis. PloS one, 2014. **9**(5): p. e96072.
- 480
- 481 33. Franz, L., et al., *Prognostic impact of neutrophils-to-lymphocytes ratio (NLR), PD-L1 expression,* and tumor immune microenvironment in laryngeal cancer. Annals of diagnostic pathology, 2021.
- 482 **50**: p. 151657.
- 483
- 484 34. Han, F., et al., *Diagnosis and survival values of neutrophil-lymphocyte ratio (NLR) and red blood* cell distribution width (RDW) in esophageal cancer. Clinica chimica acta, 2019. **488**: p. 150-158.
- 485
- 486 35. Centers for Disease Control and Prevention. *Specifying weighting parameters.* Available online at:
- 487 <http://www.cdc.gov/nchs/nhanes.htm> (accessed December 20, 2021).
- 488
- 489 36. Diallo, M.S., *samplics: a Python Package for selecting, weighting and analyzing data from complex* sampling designs. Journal of Open Source Software, 2021. **6**(68): p. 3376.
- 490
- 491 37. Borrell, L.N., et al., *Periodontitis in the United States: beyond black and white.* Journal of public
- 492 health dentistry, 2002. **62**(2): p. 92-101.
- 493
- 494 38. Yoshida, A., et al., *Etiology of aggressive periodontitis in individuals of African descent.* Japanese
- 495 Dental Science Review, 2021. **57**: p. 20-26.
- 496
- 497 39. Arab, L., et al., *Racial differences in correlations between reported dietary intakes of carotenoids* and their concentration biomarkers. The American journal of clinical nutrition, 2011. **93**(5): p.
- 498 1102-1108.
- 499
- 500 40. Eke, P.I., et al., *Periodontitis prevalence in adults ≥ 65 years of age, in the USA.* Periodontology
- 2000, 2016. **72**(1): p. 76-95.
41. Butani, Y., J.A. Weintraub, and J.C. Barker, *Oral health-related cultural beliefs for four racial/ethnic* groups: Assessment of the literature. BMC oral health, 2008. **8**: p. 1-13.



- 501 42. Han, C., *Oral health disparities: racial, language and nativity effects*. SSM-population health, 2019.  
502 8: p. 100436.
- 503 43. Lipsky, M.S., et al., *Men and oral health: a review of sex and gender differences*. American journal  
504 of men's health, 2021. 15(3): p. 15579883211016361.
- 505 44. Leite, F.R., et al., *Effect of smoking on periodontitis: a systematic review and meta-regression*.  
506 American journal of preventive medicine, 2018. 54(6): p. 831-841.
- 507 45. Arrazola, R.A., et al., *Peer Reviewed: US Cigarette Smoking Disparities by Race and Ethnicity—Keep  
508 Going and Going!* Preventing Chronic Disease, 2023. 20.
- 509 46. Nguyen-Grozavu, F.T., et al., *Widening disparities in cigarette smoking by race/ethnicity across  
510 education level in the United States*. Preventive medicine, 2020. 139: p. 106220.
- 511 47. Rakic, J.M., et al., *Dietary lycopene attenuates cigarette smoke-promoted nonalcoholic  
512 steatohepatitis by preventing suppression of antioxidant enzymes in ferrets*. The Journal of  
513 nutritional biochemistry, 2021. 91: p. 108596.
- 514 48. Duffy, E.L., et al., *Association between type of health insurance and children's oral health, NHANES  
515 2011–2014*. Journal of public health dentistry, 2018. 78(4): p. 337-345.
- 516 49. Lewis, C., et al., *Dental insurance and its impact on preventive dental care visits for US children*.  
517 The Journal of the American Dental Association, 2007. 138(3): p. 369-380.
- 518 50. Medicare.gov, *Dental Services*. ([https://www.medicare.gov/coverage/dental-  
519 services#:~:text=In%20most%20cases%2C%20Medicare%20doesn,extractions%2C%20or%20it  
520 ms%20like%20dentures](https://www.medicare.gov/coverage/dental-services#:~:text=In%20most%20cases%2C%20Medicare%20doesn,extractions%2C%20or%20it%20like%20dentures)).
- 521 51. *Health benefits & coverage*. (<https://www.healthcare.gov/coverage/dental-coverage>).
- 522 52. Lopez-Valverde, N., et al., *Systematic review and meta-analysis of the antioxidant capacity of  
523 lycopene in the treatment of periodontal disease*. Frontiers in Bioengineering and Biotechnology,  
524 2024. 11: p. 1309851.

525
